# Supplementary material for: Enhancing carrier lifetime in SrTiO 3 via metallic doping: insights from first-principles calculations and non-adiabatic molecular dynamics
Source: Royal Society of Chemistry journal article supplement (doi:10.1039/d5ta08302h), 2025-12-16
Supplement: d5ta08302h1.pdf [file d5ta08302h1.pdf]

## Supplement Material

### **Enhancing Carrier Lifetime in SrTiO<sub>3</sub> via Metallic Doping: Insights from First-principles calculations and Non-adiabatic Molecular Dynamics**

**Zelong Gong,<sup>a</sup> Zhao Qian,<sup>a,\*</sup> Rajeev Ahuja<sup>b</sup>**

<sup>a</sup> *Key Laboratory for Liquid-Solid Structural Evolution and Processing of Materials (Ministry of Education), State Key Laboratory of Advanced Equipment and Technology for Metal Forming, Shandong University, Jinan, China*

<sup>b</sup> *Condensed Matter Theory, Materials Theory Division, Department of Physics and Astronomy, The Ångström Laboratory, Uppsala University, Uppsala, Sweden*

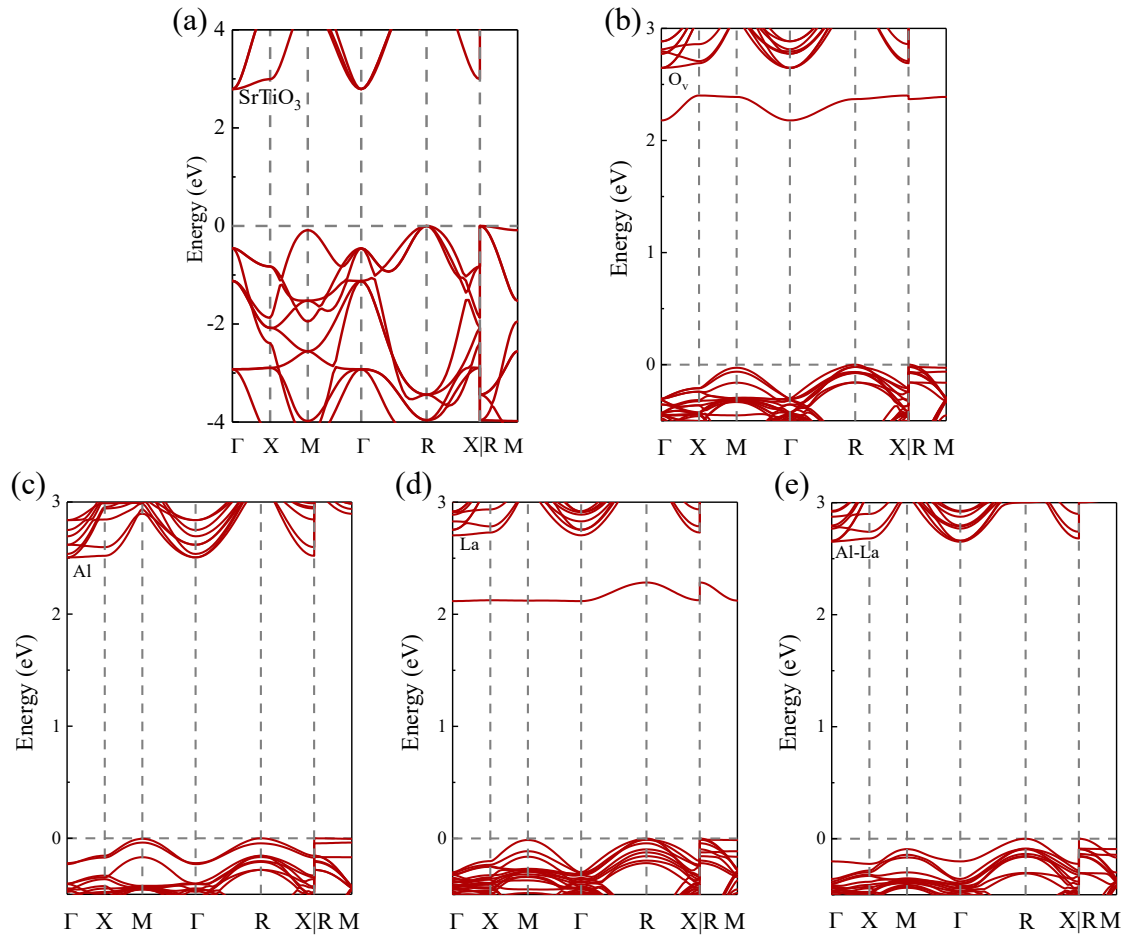

Figure S1. The band structures of (a) pristine, (b) O<sub>v</sub>, (c) Al-doped, (d) La-doped, and (e) Al-La co-doped SrTiO<sub>3</sub>.

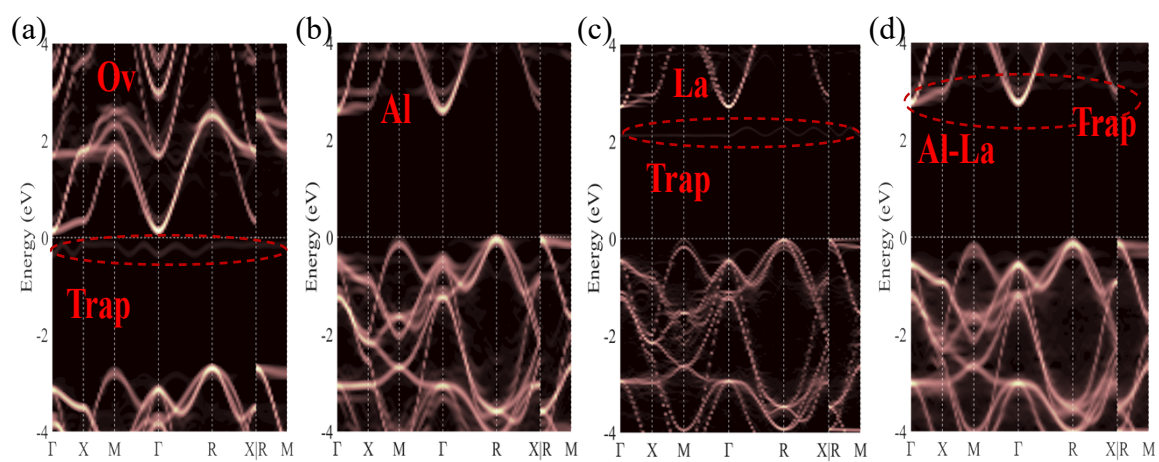

Figure S2. The unfolded band structures of the (a)  $O_v$ , (b) Al-doped, (c) La-doped, and (d) Al-La co-doped system.
